# Supplementary material
Source: PubMed Central journal article supplement (PMC5218575)
Supplement: NIHMS65650-supplement-Supplementary_Tables_1-5__7.pdf [file NIHMS65650-supplement-Supplementary_Tables_1-5__7.pdf]

Supplementary Table 1

**Variation in steroid concentrations.** Generalized linear model of variation in steroid concentrations with respect to morph and date.

| Fixed Effects            | Total Testosterone (T + DHT) |        |            |         | Androstenedione (A4) |          |            |         |
|--------------------------|------------------------------|--------|------------|---------|----------------------|----------|------------|---------|
|                          | Estimate                     | SE     | $F_{1,97}$ | $P$     | Estimate             | SE       | $F_{1,97}$ | $P$     |
| Day of year              | -0.0610                      | 0.0360 | 0.55       | 0.460   | 0.18720              | 0.187200 | 6.77       | 0.010   |
| Day <sup>2</sup>         | 0.0002                       | 0.0001 | 0.94       | 0.330   | -0.00075             | 0.000121 | 8.37       | < 0.010 |
| Morph (Ind – Sat)        | -9.3090                      | 2.9420 | 10.01      | < 0.010 | 13.10050             | 3.174700 | 17.03      | < 0.001 |
| Day of year x morph      | 0.1580                       | 0.0480 | 10.88      | ≤ 0.001 | -0.23770             | 0.052580 | 20.44      | < 0.001 |
| Day <sup>2</sup> x morph | -0.0010                      | 0.0000 | 10.33      | < 0.010 | 0.00090              | 0.000200 | 19.65      | < 0.001 |
| Random effects           |                              |        |            |         |                      |          |            |         |
| Assay Method             | 0.000                        | 0.000  |            |         | 0.00                 | 0.00     |            |         |
| Year                     | 0.000                        | 0.000  |            |         | 0.00                 | 0.00     |            |         |
| Bird                     | 0.083                        | 0.093  |            |         | 0.00                 | 0.00     |            |         |

Supplementary Table 2

**Overview of the genomic sequencing data.** Library, platform and mapping information for high-throughput DNA and RNA sequencing.

| Sample ID                              | Library <sup>1</sup> | Platform <sup>2</sup> | Insert Size (bp) | Read length (bp) | No. of reads | No. clean reads        | No. mapped reads <sup>3</sup> | Mapped reads <sup>3</sup> (%) |
|----------------------------------------|----------------------|-----------------------|------------------|------------------|--------------|------------------------|-------------------------------|-------------------------------|
| <b>Genomic sequencing libraries</b>    |                      |                       |                  |                  |              |                        |                               |                               |
| MB1386                                 | DNA-PE               | IH2500                | 200              | 150              | 109,109,178  | 104,567,414            | 111,491,450                   | 99.63                         |
| MB1387                                 | DNA-PE               | IH2500                | 200              | 150              | 100,539,926  | 96,173,726             | 102,660,447                   | 99.60                         |
| MB1388                                 | DNA-PE               | IH2500                | 400              | 150              | 104,292,358  | 99,418,692             | 106,495,792                   | 99.49                         |
| MB1389                                 | DNA-PE               | IH2500                | 400              | 150              | 120,418,946  | 115,125,042            | 123,202,076                   | 99.47                         |
| MB1390                                 | DNA-PE               | IH2500                | 600              | 150              | 216,079,192  | 204,670,708            | 216,932,244                   | 99.44                         |
| MB1391                                 | DNA-PE               | IH2500                | 600              | 150              | 141,204,802  | 132,483,520            | 141,596,792                   | 99.43                         |
| MB2923                                 | DNA-MP               | IH2500                | 3,000            | 150              | 83,268,564   | 49,026,400             | 49,195,255                    | 98.70                         |
| MB2924                                 | DNA-MP               | IH2500                | 5,000            | 150              | 235,755,936  | 139,447,886            | 140,078,428                   | 98.69                         |
| PacBio                                 | PacBio               | PBII                  |                  | ~5,713           | 1,853,351    | 1,612,195 <sup>4</sup> | 1,481,807 <sup>5</sup>        | 91.91 <sup>5</sup>            |
| <b>Genomic re-sequencing libraries</b> |                      |                       |                  |                  |              |                        |                               |                               |
| MB8684                                 | DNA-PE               | IH2500                | 550              | 150              | 805,311,920  |                        | 795,419,399                   | 98.77                         |
| MB8685                                 | DNA-PE               | IH2500                | 550              | 150              | 624,247,439  |                        | 616,286,971                   | 98.72                         |
| MB8686                                 | DNA-PE               | IH2500                | 550              | 150              | 931,537,826  |                        | 918,758,871                   | 98.63                         |
| MB8687                                 | DNA-PE               | IH2500                | 550              | 150              | 763,312,379  |                        | 753,655,429                   | 98.73                         |
| MB8688                                 | DNA-PE               | IH2500                | 550              | 150              | 700,990,546  |                        | 692,791,230                   | 98.83                         |
| <b>RNAseq libraries</b>                |                      |                       |                  |                  |              |                        |                               |                               |
| Egg                                    | RNA-PE               | IH2500                |                  | 150              | 47,200,308   | 24,790,198             | 22,575,206                    | 91.07                         |
| Chick heart                            | RNA-PE               | IH2500                |                  | 150              | 73,554,376   | 38,225,478             | 34,481,114                    | 90.20                         |
| Chick lung                             | RNA-PE               | IH2500                |                  | 150              | 49,638,762   | 25,928,198             | 23,166,138                    | 89.35                         |
| Chick brain                            | RNA-PE               | IH2500                |                  | 150              | 36,948,692   | 19,326,273             | 17,598,275                    | 91.06                         |
| Female heart                           | RNA-PE               | IH2500                |                  | 150              | 52,972,520   | 27,625,579             | 25,031,195                    | 90.61                         |
| Female brain                           | RNA-PE               | IH2500                |                  | 150              | 48,012,484   | 25,162,177             | 22,875,920                    | 90.91                         |
| Male testes                            | RNA-PE               | IH2500                |                  | 150              | 53,455,840   | 27,866,438             | 25,507,436                    | 91.53                         |
| Male brain                             | RNA-PE               | IH2500                |                  | 150              | 49,618,940   | 25,888,872             | 23,889,673                    | 92.28                         |
| Male liver                             | RNA-PE               | IH2500                |                  | 150              | 47,489,458   | 24,849,173             | 22,383,425                    | 90.08                         |

<sup>1</sup> DNA-MP: genomic paired-end; DNA-MP: genomic mate pair, RNA-PE: stranded mRNA paired-end.

<sup>2</sup> IH2500: Illumina HiSeq 2500; PBII: PacBio RS II platform

<sup>3</sup> Calculated by samtools flagstat.

<sup>4</sup> Reads > 1000 kb.

<sup>5</sup> Uniquely mapping reads calculated directly.

### Supplementary Table 3

**Genome assembly statistics.** Table showing summary of genome assembly of the ruff genome.

|                    | Contigs       | Scaffolds     |
|--------------------|---------------|---------------|
| Total number       | 41,014        | 18,799        |
| Total length (bp)  | 1,154,149,914 | 1,165,202,088 |
| Longest (bp)       | 3,674,146     | 9,022,850     |
| > 1k bp            | 28,293        | 12,079        |
| > 10k bp           | 10,410        | 4,346         |
| > 100k bp          | 2,505         | 1,753         |
| > 1M bp            | 112           | 238           |
| Mean length (bp)   | 28,140        | 61,982        |
| Median length (bp) | 2,244         | 1,725         |
| N50 length (bp)    | 265,412       | 878,409       |
| L50 count          | 975           | 292           |
| %N                 | 0.04          | 0.99          |

## Supplementary Table 4

**Genome annotation statistics.** Table with summary of the gene annotation for the final assembly.

|                                             | No. predicted genes |
|---------------------------------------------|---------------------|
| Trinity highly expressed unique transcripts | 30089               |
| Maker pass1 total mRNA                      | 54598               |
| Maker pass1 mRNA AED <sup>*</sup> < 1       | 17499               |
| Augustus                                    | 29596               |

<sup>\*</sup>AED: Annotation Edit Distance

## Supplementary Table 5

**Genome assembly statistics.** Table with CEGMA completeness report for the genome assembly.

| CEGMA    | No. Proteins | % Complete | Total <sup>‡</sup> | Aver <sup>†</sup> | % Orthol <sup>‡</sup> |
|----------|--------------|------------|--------------------|-------------------|-----------------------|
| Complete | 140          | 56.5       | 172                | 1.2               | 17.1                  |
| Partial  | 220          | 88.7       | 354                | 1.6               | 45.9                  |

<sup>‡</sup>Total number of detected copies of the genes,

<sup>†</sup>Average number of copies per gene,

<sup>‡</sup>Average percentage of orthology

Supplementary Table 7

**Candidate genes within the inversion.** Candidate genes of known function that might contribute to phenotypic differences among alternative reproductive morphs in ruffs.

| Gene ID                       | Location                                                | Length <sup>1</sup> | Protein                                                                                  | Identity <sup>2</sup> | Function <sup>3</sup>                                     |
|-------------------------------|---------------------------------------------------------|---------------------|------------------------------------------------------------------------------------------|-----------------------|-----------------------------------------------------------|
| 9645<br>9646<br>9647<br>14258 | Contig 2063<br>866370-88102,<br>Contig 1270<br>554-6565 | 1060                | Zinc finger protein <i>ZFPM1</i>                                                         | 75%                   | transcription factor,<br>expressed in gonads              |
| 9689                          | Contig 1270<br>691183-698352                            | 480                 | Growth arrest-specific protein<br><i>GAS8</i>                                            | 91%                   | sperm motility                                            |
| 9685 <sup>4</sup>             | Contig 1270<br>663189-673684                            | 1345                | Transcription factor <i>TCF25</i>                                                        | 90%                   | transcription factor                                      |
| 9686                          | Contig 1270<br>676152-677096                            | 314                 | Melanocortin 1 receptor<br><i>MC1R</i>                                                   | 96%                   | pigmentation regulation                                   |
| 18874                         | Contig 3357<br>542795-590127                            | 1260                | 1-phosphatidylinositol<br>-bisphosphate<br>phosphodiesterase $\gamma$ -2<br><i>PLCG2</i> | 98%                   | steroid hormone<br>metabolism, feather<br>array formation |
| 18875                         | Contig 3357<br>597364-600788                            | 535                 | Short-chain dehydrogenase<br>reductase <i>SDR42E1</i>                                    | 94%                   | steroid hormone<br>metabolism                             |
| 18876                         | Contig 3357<br>618128-629243                            | 385                 | Estradiol 17-beta<br>dehydrogenase<br><i>HSD17B2</i>                                     | 90%                   | steroid hormone<br>metabolism                             |
| 9705                          | Contig 1270<br>798473-809553                            | 148                 | Cytochrome b5 <i>CYB5B</i>                                                               | 87%                   | steroid hormone<br>metabolism                             |
| 20688                         | Contig 4111<br>44279-59313                              | 322                 | Palmitoyltransferase<br><i>ZDHC7</i>                                                     | 98%                   | steroid receptor<br>regulation                            |

<sup>1</sup>Amino-acid sequence length predicted from reference genome.

<sup>2</sup>Mean similarity to identified blast homologues.

<sup>3</sup>Relevant function regarding morph differences.

<sup>4</sup>Gene 9685 is included as a transcription factor of unknown function because it lies in a region with a high density of Satellite-specific differences in close proximity to *MC1R*.
